# Supplementary material for: A novel CSN5/CRT O-GlcNAc/ER stress regulatory axis in platinum resistance of epithelial ovarian cancer
Source: PubMed Central journal article supplement (PMC10878149; doi:10.7150/ijbs.89700), 2024-01-27
Supplement: ijbsv20p1279s1.pdf [file ijbsv20p1279s1.pdf]

## Figure S1

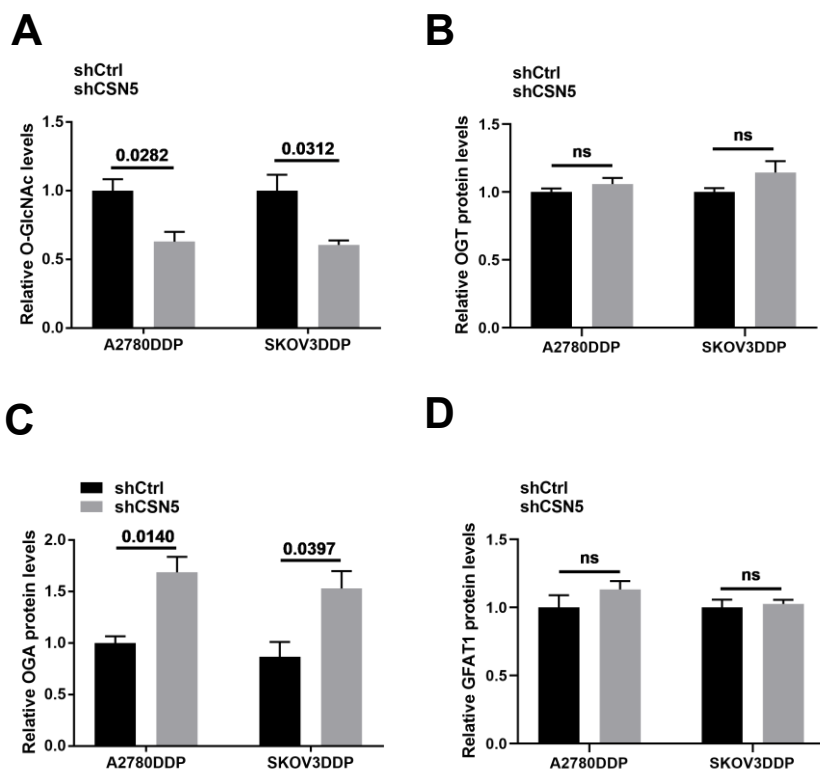

Figure S1. Statistic analyses of protein expression in DDP cells with or without CSN5 knockdown. Data are presented as mean  $\pm$  SEM.

## Figure S2

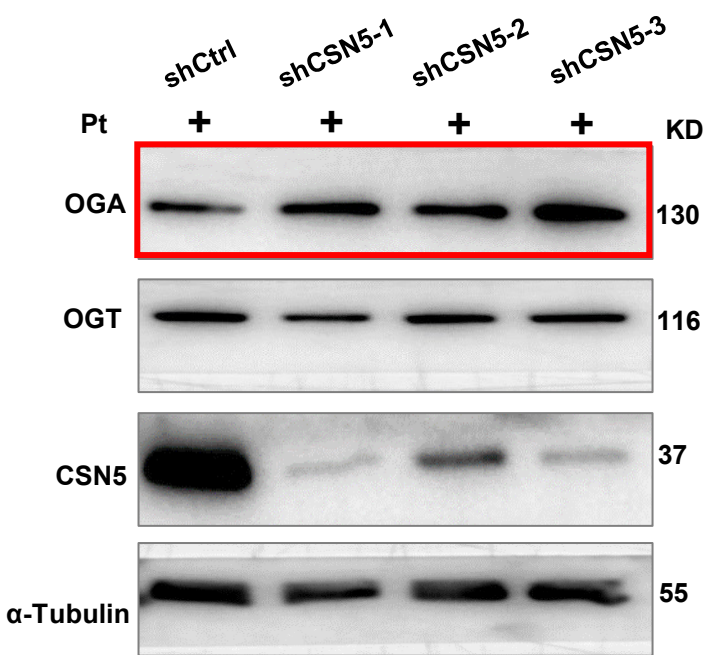

Figure S2. Effects of CSN5 knockdown on the expression of OGA and OGT.

## Figure S3

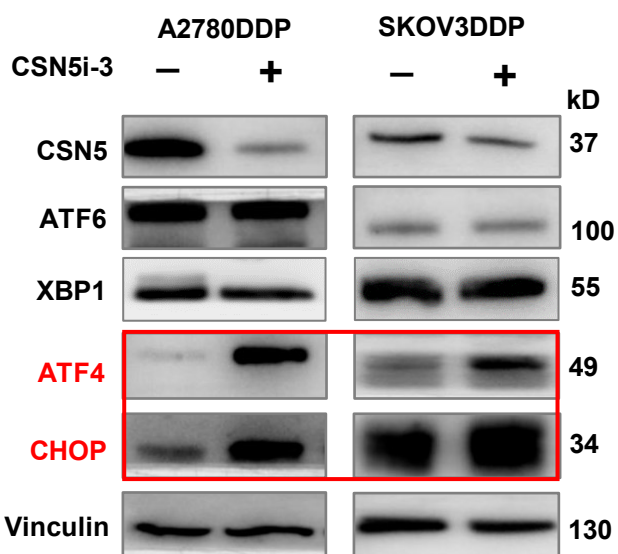

Figure S3. Effects of CSN5 knockdown on the expression of ER stress markers.

**Figure S4**

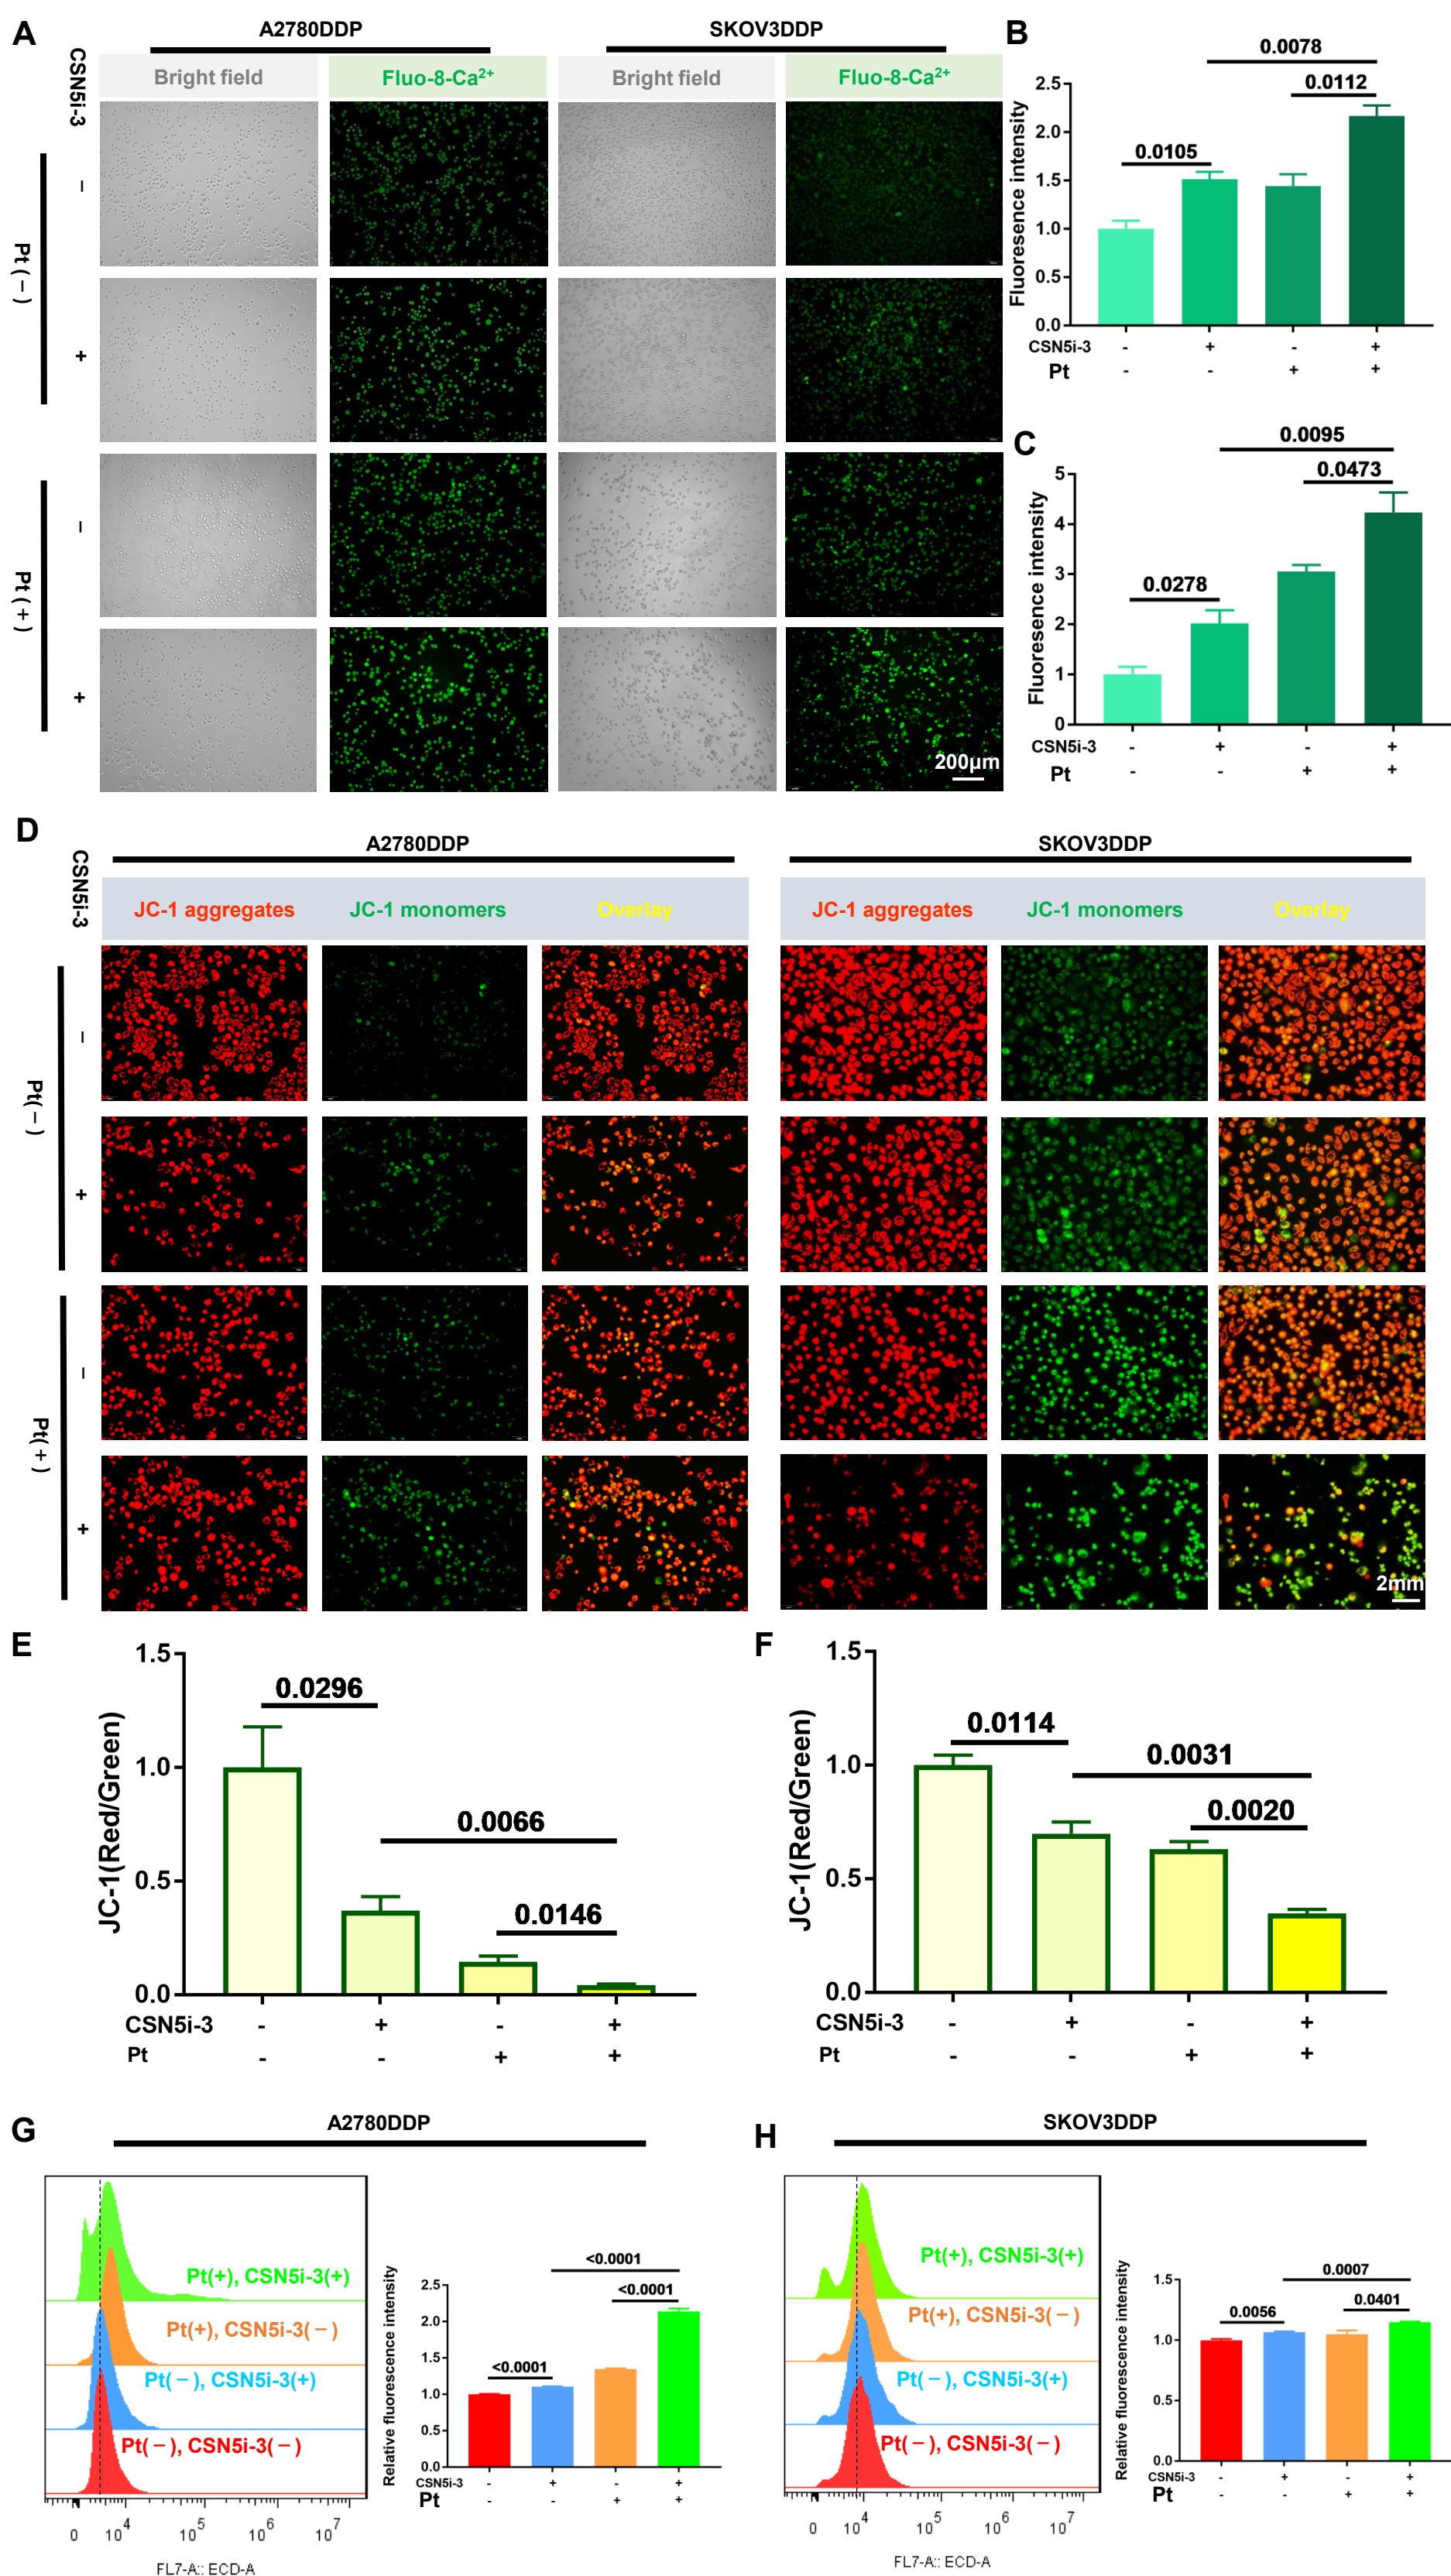

Figure S4. CSN5 inhibition induced Ca<sup>2+</sup> disturbances and mitochondrial dysfunction. A2780/DDP and SKOV3/DDP cells with or without CSN5 knockdown were treated with cisplatin for 24 h. (A-C) Immunofluorescent staining was used to examine cytoplasmic Ca<sup>2+</sup> levels (Scale bar = 200  $\mu$ m). (D) The disruption of MMP was investigated using JC-1 assay by immunofluorescent staining (Scale bar = 2  $\mu$ m). (E, F) Relative JC-1 red/green ratio is represented as a bar graph in percentage-ratio under the Immunofluorescent staining data. (G, H) ROS levels were investigated using DHE labeled kit. Relative cellular ROS levels were represented as a bar graph in percentage-ratio under the flow cytometry data. All experiments were performed in triplicate.

Figure S5

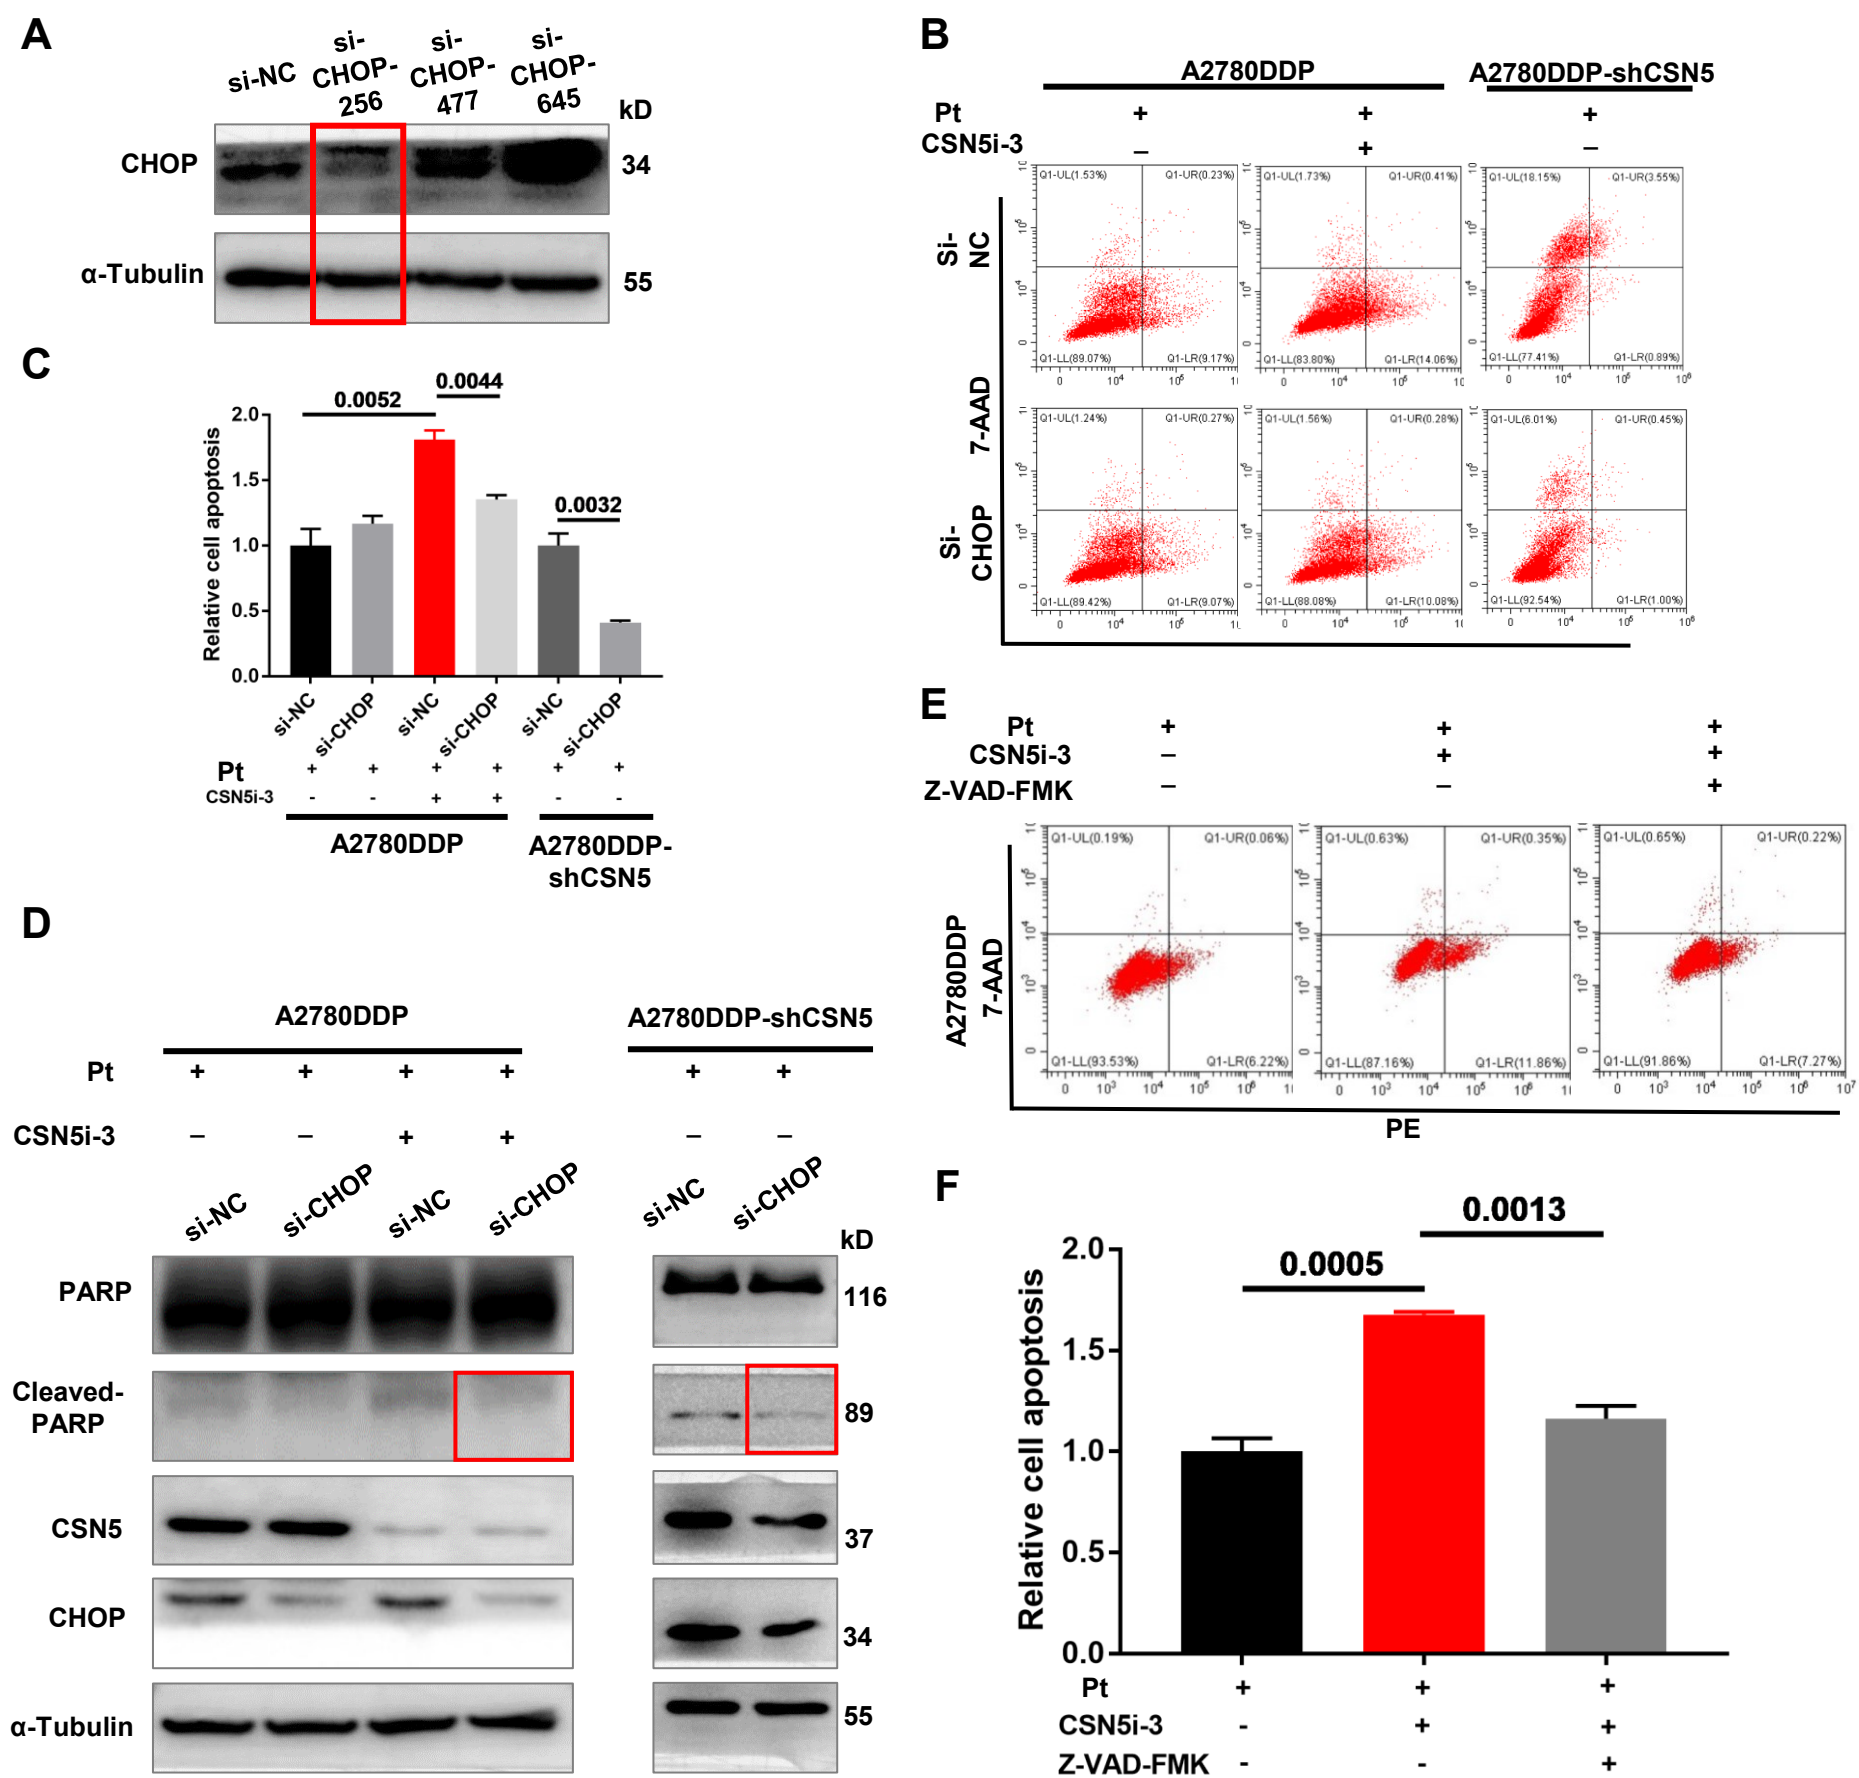

Figure S5. Genetic inhibition of CHOP or caspase suppressant involvement partly abrogated the apoptosis induced by CSN5 inhibition. (A) Knockdown efficiency of CHOP in A2780/DDP cells was evaluated by Western blot. (B) A2780/DDP cells with or without CSN5 inhibition were exposed to cisplatin for 24 h, and FCM was utilized to detect the apoptotic ratio. (C) The apoptotic ratio were quantified by histogram. (D) A2780/DDP cells with or without CSN5 inhibition were exposed to cisplatin for 48 h, and the apoptotic markers Cleaved-PARP/PARP were analyzed by Western blot. (E) A2780/DDP cells with or without CSN5 inhibition pretreated with pretreatment of pan-caspase suppressor(Z-VAD-FMK, 10  $\mu$ M) or not were exposed to cisplatin for 24 h, and flow cytometry analysis was utilized to detect the apoptotic ratio. (F) The apoptotic ratio was quantified as mean  $\pm$  SEM.

## Figure S6

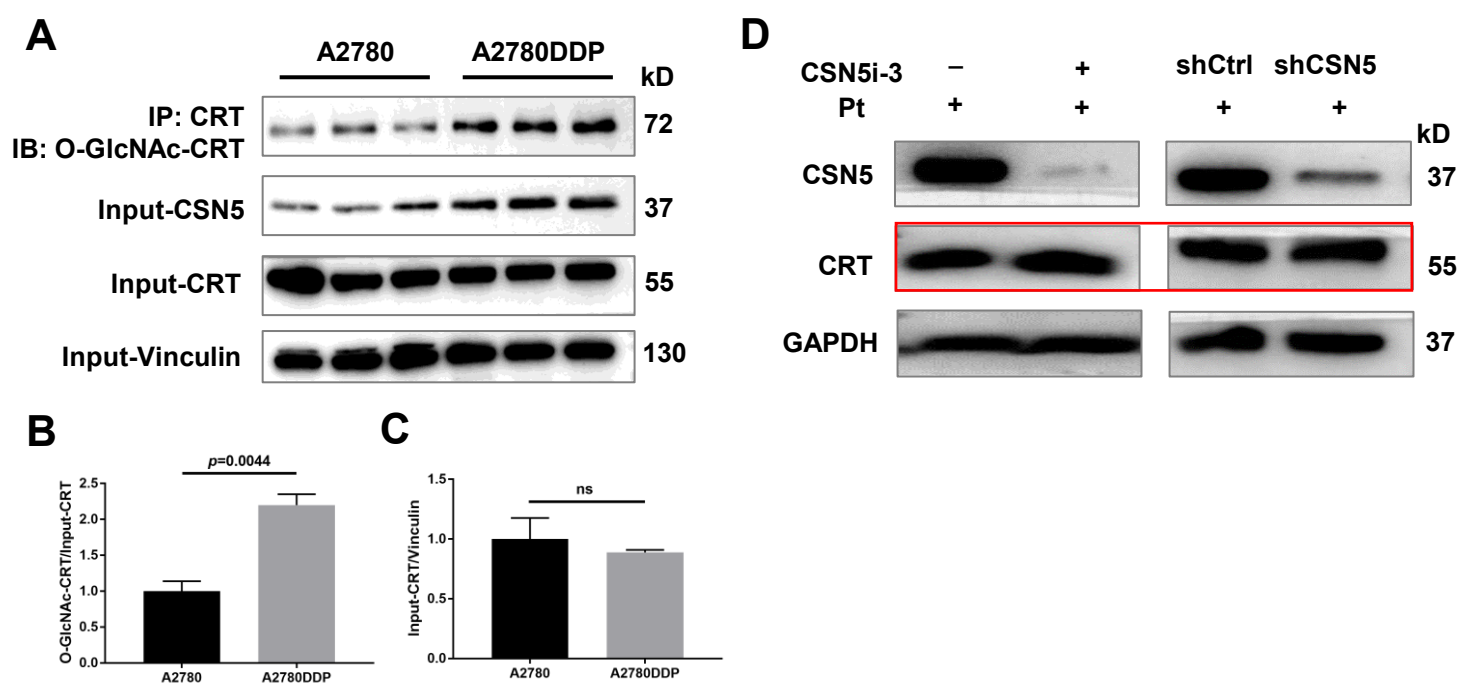

Figure S6 Levels of CRT and its O-GlcNAc in ovarian cancer parent cell 2780 and platinum-resistant cell A2780/DDP with or without CSN5 downregulation. (A) Expression levels of O-GlcNAcylated CRT in ovarian cancer parent cell 2780 and platinum-resistant cell A2780/DDP was detected by Immunoprecipitation and Immunoblotting (IP-IB) with the indicated antibodies. (B) The ratio of O-GlcNAc-CRT to total CRT was quantified. (C) The ratio of total CRT to internal reference protein vinculin was quantified. (D) Expression levels of CRT in A2780/DDP cells with or without CSN5 inhibition was detected by IB.

## Figure S7

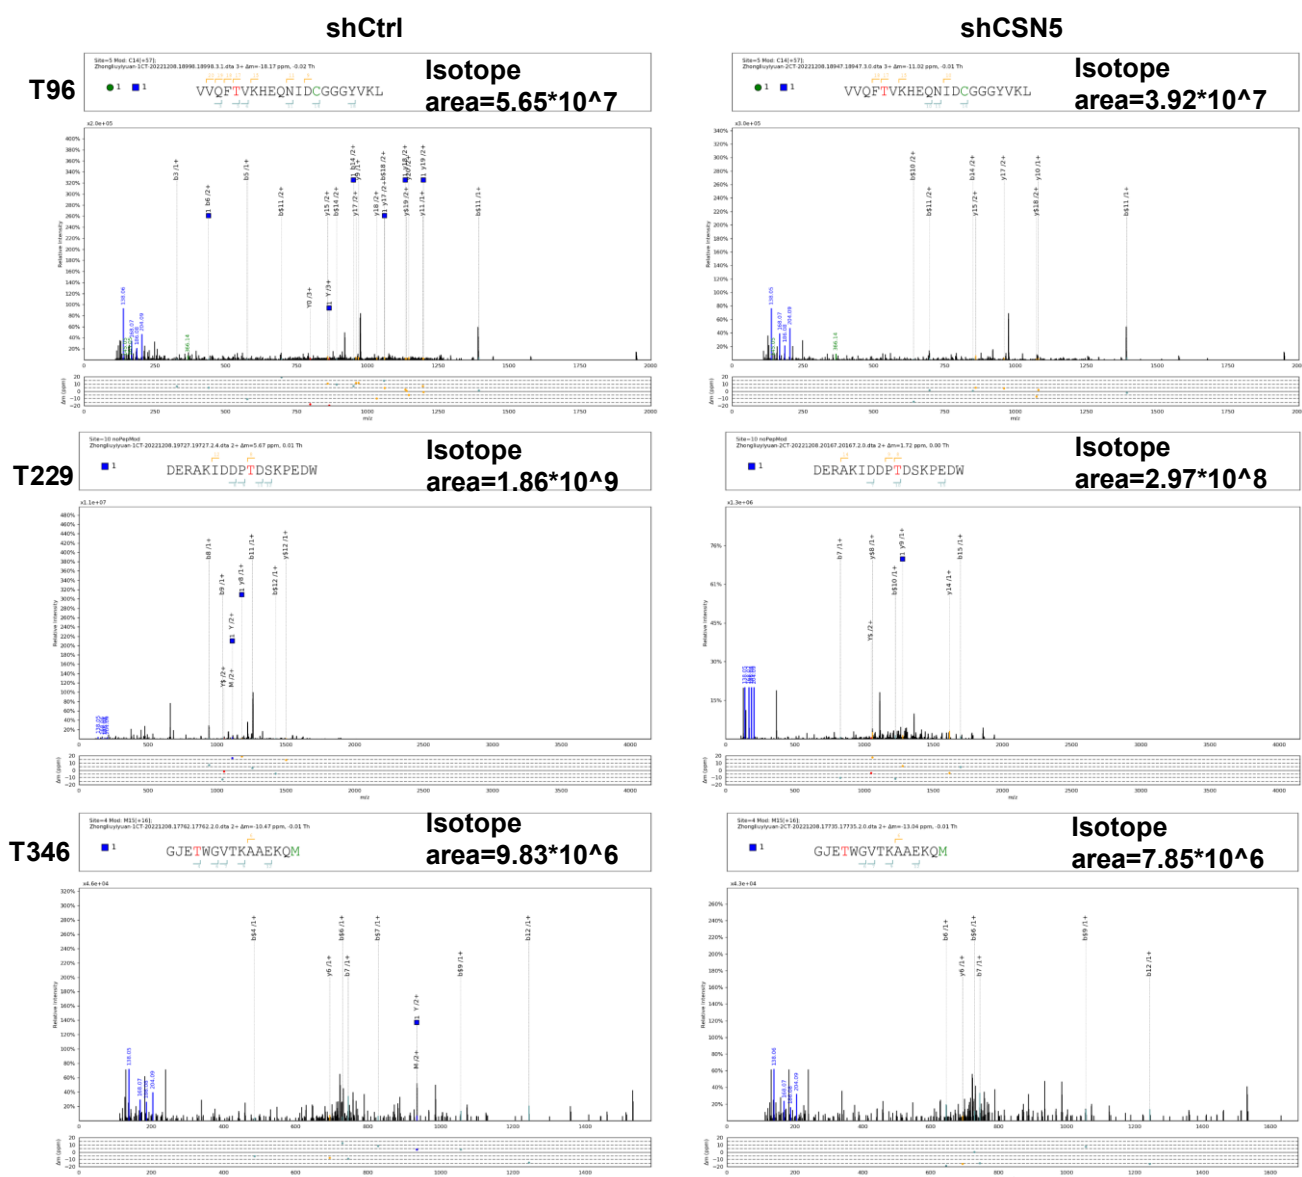

Figure S7. The potential O-GlcNAcylation sites screened by the LC-MS/MS. CRT was purified from A2780/DDP cells with or without CSN5 knockdown, and analyzed by MS to identify the O-GlcNAcylation sites. Three different O-GlcNAcylation sites in CRT were shown.

## Figure S8

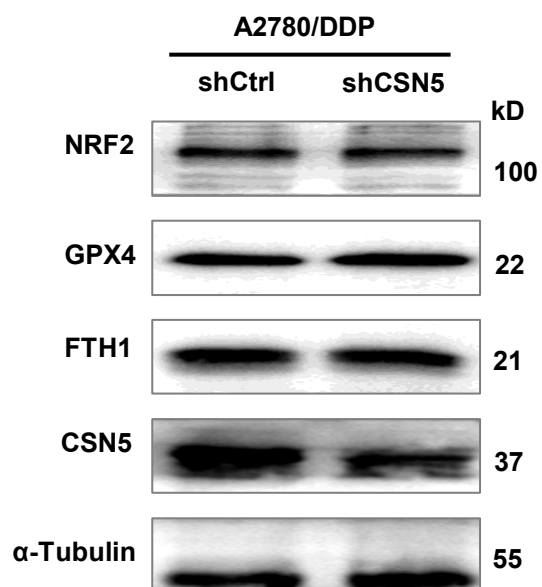

Figure S8 Levels of ferroptosis-related markers in A2780/DDP cells with or without CSN5 knockdown.

**Figure S9**

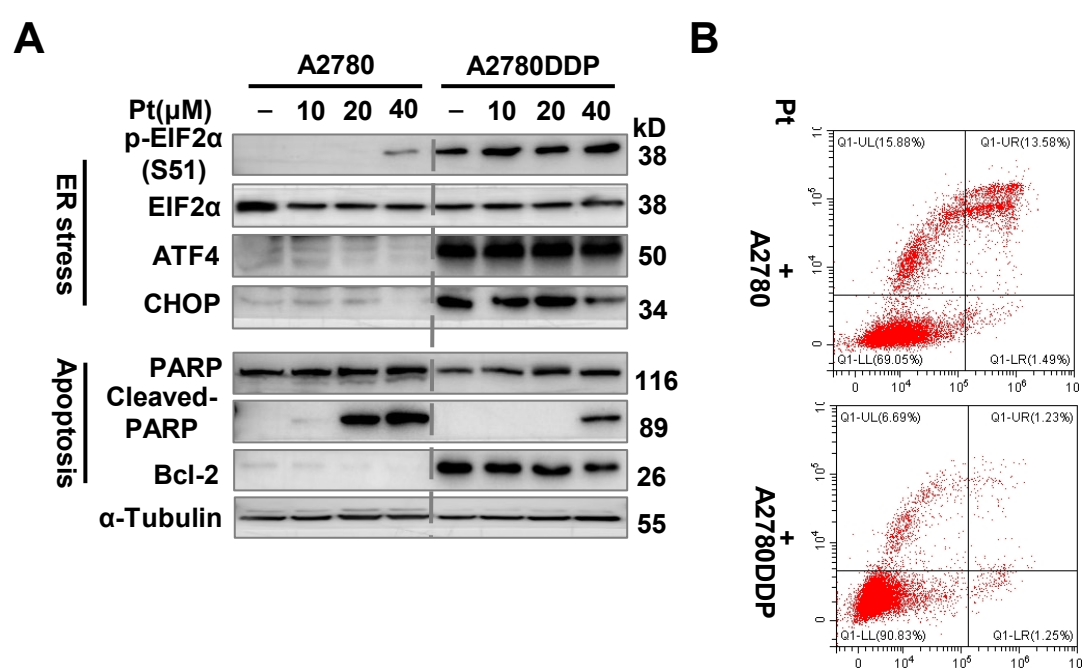

Figure S9. Basal activation of ER stress endowed DDP cells with tolerance to cisplatin-induced cell death. (A) Parental OC cells and the corresponding platinum-resistant ones were exposed to cisplatin in different doses, and the ER stress and apoptotic markers were detected by IB. (B) Parental EOC cells and the corresponding DDP-resistant ones were treated with cisplatin for 24 h, and the apoptotic ratio were tested by flow cytometry analysis.

**Figure S10**

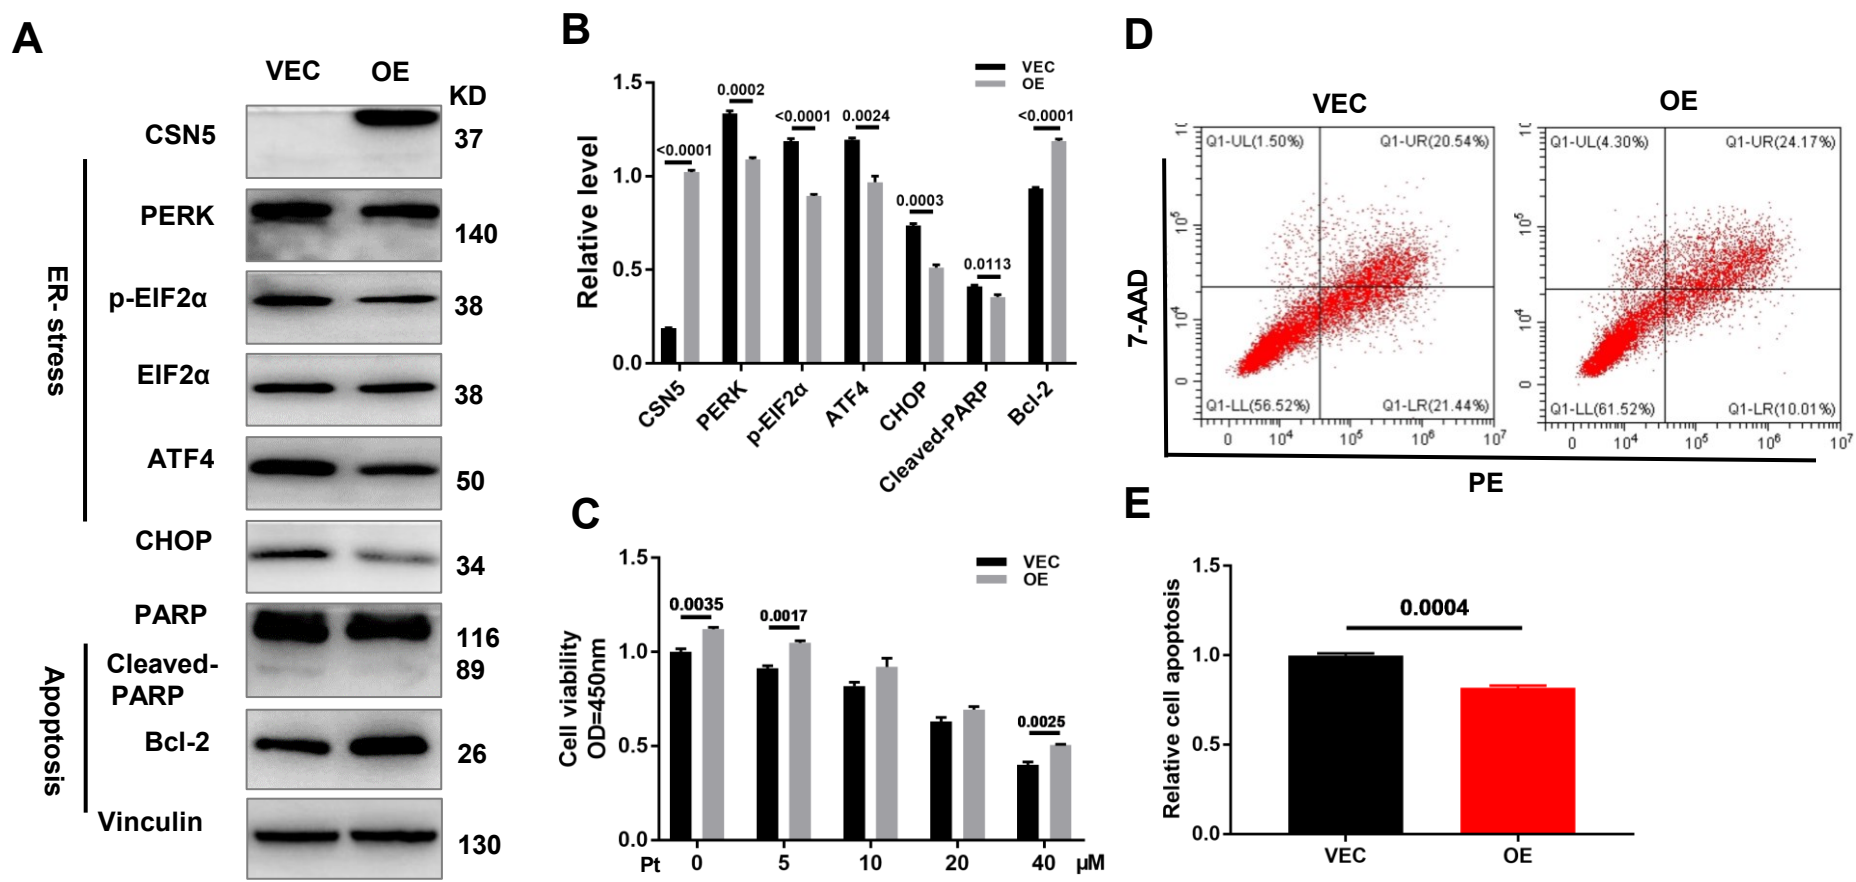

Figure S10. Re-overexpression of CSN5 in CSN5 knockdown A2780/DDP cells inhibited the ER stress signaling and stimulated platinum-resistant phenotypes. (A, B) ER stress and apoptosis-related markers were illustrated by IB, and the protein gray value was statistically quantified as mean  $\pm$  SEM. (C) Cell viability was detected by CCK-8 assay. (D, E) Cell apoptosis was evaluated via flow cytometry analysis and the relative apoptotic ratio was quantified as mean  $\pm$  SEM.

**Table S1 shRNA sequences.**

| Targets  | Sequence 5'-3'             |
|----------|----------------------------|
| shCSN5-1 | CGCCTTTAGGACATACCCAAA      |
| shCSN5-2 | GTCTCAGGTTATTAAGGATAA      |
| shCSN5-3 | GATCCGCTTACGAATGCAGACTATAC |
| shCtrl   | CCTAAGGTAAAGTCGCCCTCG      |

**Table S2 siRNA sequences.**

| Targets    |   | Sequence 5'-3'         |
|------------|---|------------------------|
| siCHOP-256 | F | GGUCCUGUCUUCAGAUGAATT  |
|            | R | UUCAUCUGAAGACAGGACCTT  |
| siCHOP-477 | F | GAACCAGGAAACGGAAACATT  |
|            | R | UGUUUCCGUUCCUGGUUCTT   |
| siCHOP-645 | F | GAGCUCUGAUUGACCGAAUTT  |
|            | R | AUUCGGUCAAUUCAGAGCUCTT |
| siNC       | F | UGACCUCAACUACAUGGUUTT  |
|            | R | AACCAUGUAGUUGAGGUCATT  |



**Table S3 Antibodies used in this study.**

| Antibody                              | Manufacturer         | Code number |
|---------------------------------------|----------------------|-------------|
| CSN5                                  | CST                  | 6895        |
| CRT                                   | Santa Cruz           | SC-373863   |
| CRT                                   | Abcam                | 92516       |
| PERK                                  | CST                  | 5683        |
| p-EIF2 $\alpha$                       | CST                  | 3398        |
| EIF2 $\alpha$                         | CST                  | 5324        |
| ATF4                                  | Proteintech          | 10835-1-AP  |
| CHOP                                  | Proteintech          | 15204-1-AP  |
| ATF6                                  | Proteintech          | 24169-1-AP  |
| XBP1                                  | Santa Cruz           | SC-8015     |
| ATF3                                  | CST                  | 18665       |
| PARP                                  | CST                  | 9532        |
| Cleaved-PARP                          | CST                  | 5625        |
| Bcl-2                                 | Proteintech          | 12789-1-AP  |
| Cyt C                                 | CST                  | 4280        |
| PCNA                                  | Santa Cruz           | SC-56       |
| O-GlcNAc                              | Abcam                | 2739        |
| O-GlcNAc                              | Abcam                | 202665      |
| OGA                                   | Abcam                | 124807      |
| OGT                                   | Abcam                | 177941      |
| GFPT-1                                | Proteintech          | 14132-1-AP  |
| Vinculin                              | CST                  | 13901       |
| Tubulin                               | Proteintech          | 11224-1-AP  |
| GAPDH                                 | Proteintech          | 60004-1-Ig  |
| Phos (Ser/Thr)                        | AmyJet Scientific    | PP2551      |
| Phos (Tyr)                            | PTM BioLab           | PTM-702RM   |
| Acetylation                           | PTM BioLab           | PTM-105RM   |
| Ubiquitination                        | Santa Cruz           | SC-166553   |
| Flag-tag                              | CST                  | 14793       |
| Flag-tag                              | Proteintech          | 66008-4-Ig  |
| His-tag                               | CST                  | 12698       |
| His-tag                               | Proteintech          | 10001-0-AP  |
| His-tag                               | Proteintech          | 66005-1-Ig  |
| HA-tag                                | Proteintech          | 51064-2-AP  |
| NRF2                                  | CST                  | 12721       |
| GPX4                                  | Proteintech          | 67763-1-Ig  |
| FTH1                                  | CST                  | 4393        |
| HRP-conjugated Goat Anti-Rabbit IgG   | Proteintech          | SA00001-2   |
| HRP-conjugated Goat Anti-Mouse IgG    | Proteintech          | SA00001-1   |
| Goat anti-Rabbit IgG, DyLight™ 488    | Invitrogen           | 35552       |
| Goat anti-Mouse IgG, Alexa Fluor™ 555 | Invitrogen           | A32727      |
| Universal anti-Mouse/Rabbit-HRP       | Long Island Antibody | D-3004      |

**Table S4 CRT-CRISPR/Cas9-sgRNA target sequences.**

| NO.     | TargetSeq            |
|---------|----------------------|
| sgRNA-1 | GCCGCACAATCAGTGTGTAC |
| sgRNA-2 | GAAGATGACATGAACCTTCT |
| sgRNA-3 | CTCAGTTCCGGCAAGTTCTA |

**Table S5 Primers for qRT-PCR.**

| Genes |   | Primer sequence 5'-3'     |
|-------|---|---------------------------|
| Csn5  | F | GATCGGGAGGCAACTTGGAAG     |
|       | R | TGCGGATATTGTTCTTGTTGGA    |
| Atf4  | F | CATTCCTCGATTC CAGCAAAGCAC |
|       | R | TTCTCCAACATCCAATCTGTCCCG  |
| chop  | F | GCACCTCCCAGAGCCCTCACTCTCC |
|       | R | GTCTACTCCAAGCCTTCCCCCTGCG |
| Atf3  | F | TGGCAACACGGAGTAAACGA      |
|       | R | GCATCATTTTGCTCCAGGCTC     |
| Atf6  | F | AACAAGACCACAAGACCA        |
|       | R | AGGAGGAACTGACGAACT        |
| Xbp1  | F | AGAGTAGCAGCTCAGACTGC      |
|       | R | CATTAATGGCTTCCAGCTTG      |
| gapdh | F | TGTTTCGTCATGGGTGTGAACC    |
|       | R | GCAGTGATGGCATGGACTGTG     |
